1

2

3

4

5 **Regulation of EBNA1 Protein Stability by PLOD1 Lysine Hydroxylase**

6

7 Jayaraju Dheekollu<sup>1</sup>, Andreas Wiedmer<sup>1</sup>, Samantha S. Soldan<sup>1</sup>, Leonardo Josué Castro

8 Muñoz<sup>1</sup>, Hsin-Yao Tang<sup>1</sup>, David W. Speicher<sup>1</sup>, and Paul M. Lieberman<sup>1,3\*</sup>

9

10

11 <sup>1</sup>The Wistar Institute, Philadelphia, PA 19104 USA

12

13 \*Correspondence: [lieberman@wistar.org](mailto:lieberman@wistar.org)

14

15 Running Title: PLOD regulation of EBNA1

16 Keywords: Epstein-Barr Virus, EBV, PLOD, OriP, episome maintenance, protein stability,

17 Procollagen-Lysine Hydroxylase

18 **Abstract**

19 Epstein-Barr virus (EBV) is a ubiquitous human  $\gamma$ -herpesvirus that is causally associated with  
20 various malignancies and autoimmune disease. Epstein-Barr Nuclear Antigen 1 (EBNA1) is the  
21 viral-encoded DNA binding protein required for viral episome maintenance and DNA replication  
22 during latent infection in proliferating cells. EBNA1 is known to be a highly stable protein, but its  
23 mechanism of protein stability is not completely understood. Proteomic analysis of EBNA1  
24 revealed interaction with Procollagen Lysine-2 Oxoglutarate 5 Dioxygenase (PLOD) family of  
25 proteins. Depletion of PLOD1 by shRNA or inhibition with small molecule inhibitors 2,-2'  
26 dipyriddy resulted in the loss of EBNA1 protein levels, along with a selective growth inhibition of  
27 EBV-positive lymphoid cells. PLOD1 depletion also caused a loss of EBV episomes from  
28 latently infected cells and inhibited *oriP*-dependent DNA replication. We used mass  
29 spectrometry to identify EBNA1 peptides with lysine hydroxylation at K460 or K461. Mutation of  
30 K460 to alanine or arginine abrogates EBNA1-driven DNA replication of *oriP*, while K461  
31 mutations enhanced replication. These findings suggest that PLOD1 is a novel post-  
32 translational regulator of EBNA1 protein stability and function in viral plasmid replication,  
33 episome maintenance and host cell survival.

34

35

36

37

38 **Importance**

39 EBNA1 is essential for EBV latent infection and implicated in viral pathogenesis. We found that  
40 EBNA1 interacts with PLOD family of lysine hydroxylases and that this interaction is required for  
41 EBNA1 protein stability and function in viral persistence during viral latent infection.  
42 Identification of PLOD1 regulation of EBNA1 protein stability provide new opportunity to target  
43 EBNA1 for degradation in EBV associated disease.

44

## 45 **Introduction**

46 Epstein-Barr Virus (EBV) is a human gammaherpesvirus that establishes life-long latent  
47 infection in over 90% of the adult population world-wide [1, 2]. EBV latent infection is a causal  
48 agent for several cancers, including Burkitt Lymphoma (BL), Nasopharyngeal Carcinoma (NPC),  
49 and post-transplant lymphoproliferative diseases (PTLD) [3-5]. EBV is also associated with  
50 several autoimmune diseases, especially multiple sclerosis (MS) where viral proteins have been  
51 implicated as the molecular mimic and trigger for auto-reactive antibodies and T-cells [6, 7].

52 Epstein-Barr Nuclear Antigen 1 (EBNA1) is the viral-encoded sequence-specific DNA-  
53 binding protein that binds to tandem repeats in the viral origin of plasmid replication (oriP) and is  
54 required for viral episome maintenance and plasmid replication during latent infection in  
55 proliferating cells [8, 9]. EBNA1 can also modulate transcription of viral and host genes, and  
56 interacts with host proteins that are implicated in viral oncogenesis, such as USP7 and CK2 [10-  
57 12]. EBNA1 is predominantly localized to the nucleus of infected cells, and is the most  
58 consistently detected protein in EBV-associated tumors. EBNA1 is also known to have a  
59 relatively long half-life (~20 hrs) in B-cells [13]. EBNA1 stabilization is partly dependent on a  
60 central gly-ala repeat that resists proteolysis associated with MHC peptide presentation [14, 15].  
61 However, EBNA1 interaction with other proteins and post-translational modifications may also  
62 contribute to its stability[16] .

63 The Procollagen-Lysine,2-Oxoglutarate 5-Dioxygenases (PLODs) are required for the  
64 post-translational modification that allows collagen cross-links and maturation of extracellular  
65 matrix (reviewed in [17]. PLOD1, 2 and 3 have different roles in collagen modification including  
66 a glycosylase activity unique to PLOD3. PLODs are expressed at different levels in different  
67 tissue types. While inherited mutations in PLODs cause connective tissue disorders, such as  
68 Ehlers-Danlos syndrome [18], upregulation of PLODs have been associated with several  
69 cancers, including gastric cancers and hepatocellular carcinomas [17, 19-23]. A recent study  
70 has found that PLOD1 and 3 can interact with EBNA1 in AGS gastric cells with preferential

71 binding to EBNA1 isoforms found in epithelial cancers [24]. Here, we further advance these  
72 pioneering studies to show that EBNA1 can interact with all three PLODs and that depletion of  
73 PLOD1, or small molecule inhibition of PLOD enzymatic activity leads to a loss of EBNA1  
74 protein stability and function in *oriP*-dependent DNA replication and episome maintenance. We  
75 also provide evidence that EBNA1 is subject to lysine hydroxylation that regulates EBNA1  
76 replication function at *oriP*.

77  
78

## 79 **Results**

80 **EBNA1 proteomics identifies interaction with PLOD family of lysine hydroxylase.** We  
81 have previously reported an LC-MS/MS proteomic analysis of EBNA1 [25]. For these studies,  
82 FLAG-EBNA1 was expressed from stable *oriP*-containing episomes to enrich for cellular  
83 proteins that bound to EBNA1 in the functional context of the *oriP*. We report here the  
84 identification of PLOD1, 2, and 3 as proteins highly enriched in FLAG-EBNA1 fraction relative to  
85 the FLAG-vector control (**Fig. 1A and B**). We also identified the USP7, which has been well-  
86 characterized for its interaction with EBNA1, and P4HA2, a proline hydroxylase related to  
87 PLODs (**Fig. 1B**). RNA analysis of PLODs revealed that two isoforms of PLOD1 (A and B) were  
88 expressed at higher levels than PLOD2 or PLOD3 in EBV+ B-cell lines (**Supplementary Fig.**  
89 **S1**). We therefore focused our efforts on characterization of PLOD1 with EBNA1 in these B-  
90 lymphocytes. Immunoprecipitation (IP) with endogenous EBNA1 in Raji and Mutu I Burkitt  
91 lymphoma cell lines revealed selective enrichment of PLOD1 relative to IgG control (**Fig. 1C**).  
92 Similarly, reverse IP with PLOD1 in Raji and Mutu I cells revealed selective enrichment of  
93 EBNA1 relative to IgG control (**Fig. 1D**). Interestingly, EBNA1 species precipitated in PLOD1 IP  
94 had an additional EBNA1 reactive species (\*) of slower mobility, suggesting potential EBNA1  
95 post-translational modification when complexed with PLOD1.

96

97 **Inhibitor of PLOD1 leads to loss of EBNA1.** To investigate the potential effects of PLOD1 on  
98 EBNA1 protein expression, we first generated lentivirus expressing shRNA targeting PLOD1.  
99 We found that shRNA depletion of PLOD1 in Raji BL cells led to a significant loss of expression  
100 of PLOD1, indicating that shRNA knock-down was working efficiently (**Fig. 2A, top panel**). In  
101 the same knock-down of PLOD1, we observed a reduction in EBNA1 protein, along with a  
102 down-shift in EBNA1 mobility in SDS-PAGE Western blot (**Fig. 2A**). We also observed a similar  
103 change in EBNA2 and to a lesser extent that of LMP1, while cellular actin was not affected (**Fig.**  
104 **2A**). To determine if these effects of PLOD1 protein depletion correlated with loss of PLOD1  
105 enzymatic activity, we assayed the effects of a small molecule inhibitor of PLOD1. Bipyridine  
106 (also known as 2,2 dipyridil and referred to here as 2-DP) has been reported to have selective  
107 inhibition of PLOD1 [26]. We found that treatment of Raji and LCLs with 2-DP (100  $\mu$ M) led to a  
108 loss of EBNA1 and EBNA2 in both cell types, with less of an effect on LMP1 or cellular actin  
109 (**Fig. 2B**), thus phenocopying shRNA depletion of PLOD1. To determine if the loss of EBNA1  
110 protein levels were partly due to proteasome degradation, we assayed the effects of 2-DP in  
111 combination with proteasome inhibitor MG132 (**Fig. 2C**). We found that MG132 stabilized  
112 EBNA1 protein in the presence of 2-DP, suggesting that 2-DP leads to proteosomal degradation  
113 of EBNA1. EBNA1 protein can be destabilized by other small molecules, such as the HSP90  
114 inhibitor 17-DMGA [27]. We found that 17-DMGA did not lead to the degradation of EBNA1 as  
115 did 2-DP under these conditions. Since 2-DP has the potential to chelate iron and induce  
116 hypoxia stress response, we compared the effects of 2-DP to treatment of  $\text{CoCl}_2$  a known  
117 inducer of hypoxic stress response through stabilization of HIF1A (**Fig. 2D**). We found that 2-  
118 DP led to a loss of PLOD1 and EBNA1 in both Raji and LCL, and stabilized HIF1A modestly in  
119 LCLs only. In contrast,  $\text{CoCl}_2$  stabilized HIF1A in both Raji and LCL, and reduced PLOD1 and  
120 EBNA1 in LCL, but had only weak effects on PLOD1 and EBNA1 in Raji cells. These findings  
121 suggest that 2-DP may inhibit PLOD1 through mechanisms distinct from HSP90 inhibition or

122 hypoxia stress response, although there may be some cell-type dependent overlaps with these  
123 pathways.

124

### 125 **Inhibition of PLOD1 selectively block EBV+ B cell survival.**

126 We next tested the effects of PLOD1 shRNA depletion and inhibition by 2-DP on EBV-  
127 dependent cell growth and survival. We compared EBV positive cells B-cell lines (Raji and  
128 Mutul BL and B95.8 transformed LCLs) with EBV negative B-lymphoma cell lines (BJAB and  
129 DG75). Cells were treated with 100  $\mu$ M 2-DP for 2 days or with lentivirus transduction of  
130 shPLOD1 for 4 days followed by FACS profiling for propidium iodide (PI) and annexin V staining  
131 (**Fig. 3**). We found that both shPLOD1 and 2-DP induced a significant decrease in the  
132 percentage of proliferating/live cells (Q4) for EBV-positive Mutul, Raji, and LCL relative to EBV-  
133 negative BJAB and DG75. LCLs were particularly sensitive to shPLOD1-mediated depletion  
134 (**Fig.3B**). These findings suggest that EBV positive lymphoid cells are more sensitive than EBV  
135 negative lymphoid cells to loss of PLOD1 protein and its enzymatic activity.

136

137 **PLOD1 contributes to EBV episome maintenance in latently infected B-lymphocytes.** We  
138 next assayed the effects of PLOD1 depletion on the maintenance of EBV episomes in two  
139 different BL (Mutu I and Raji) and LCL (transformed with B95-8 or Mutu virus) cell lines (**Fig. 4**).  
140 PFGE analysis revealed that shPLOD1 depletion caused a significant loss of EBV episomal  
141 DNA in each cell type (**Fig. 4A and B**). The efficiency of shPLOD1 depletion was measured by  
142 RT-qPCR and Western blot for each cell type (**Supplementary Fig S2**). EBV episome loss was  
143 striking despite relatively weak depletion of PLOD1 protein at this early time point prior to loss of  
144 cell viability.

145

146 **PLOD1 contributes to EBNA1-dependent DNA replication.** To determine if PLOD1 affected  
147 EBNA1 DNA replication function, we assayed transient plasmid replication in HEK293 cells

148 transfected with *oriP*-containing plasmids that also expressed FLAG-EBNA1. We also assayed  
149 two different PLOD1 shRNAs, shPLOD1.a and shPLOD1.b for their ability to efficiently deplete  
150 PLOD1. While shPLOD1.a and shPLOD1.b led to a modest reduction in PLOD1 protein at this  
151 time point, the depletion on FLAG-EBNA1 expression was substantial (**Fig. 5A**). We then  
152 assayed the effect of shPLOD1 on EBNA1-dependent DNA replication. We found that both  
153 shPLOD1.a and shPLOD1.b substantially reduced *oriP*-dependent DNA replication, as  
154 measured by DpnI resistance assay and Southern blot detection of *oriP*-containing plasmid  
155 DNA (**Fig. 5B and C**). These findings further support the role for PLOD1 in the stabilization of  
156 EBNA1 protein levels, and its functional importance in for *oriP*-dependent DNA replication.

157

158 **Lysine hydroxylation of EBNA1.** To investigate the possibility that EBNA1 may be subject to  
159 post-translational modification through lysine hydroxylation, we performed LC-MS/MS analysis  
160 of immunoprecipitated EBNA1. We identified one peptide with a mass/charge (*m/z*) shift  
161 consistent with a single lysine hydroxylation (**Fig. 6A-C**). The EBNA1 peptide aa 416-465 had  
162 two potential lysine residues that could be hydroxylated, K460 and K461. PLOD1 typically  
163 hydroxylates lysines that precede glycine. We therefore first tested whether mutations in K461  
164 impacted EBNA1 function in *oriP*-dependent DNA replication (**Fig. 6D-F**). We found that K461A  
165 had a modest stimulatory effect, while K461R had no significant effect on *oriP* replication (**Fig.**  
166 **6D-F**). We next asked whether mutations in the neighboring K460 had any effects on *oriP*-DNA  
167 replication (**Fig. 6G-I**). We also included a mutation in K83A, which also has a PLOD1  
168 consensus recognition site, and has been previously implicated in the PLOD1 interaction with  
169 the EBNA1 N-terminus. All EBNA1 mutants were expressed at similar levels in HEK293T cells  
170 (**Fig. 6G**). We found that K83A had a modest enhancement of *oriP* replication, while both  
171 K460A and K460R reduced *oriP* replication >5-fold (**Fig. 6H and I**). We also found that  
172 mutations in both K460A and K461A bound to *oriP* similar to wild-type EBNA1 as measured by  
173 ChIP assay, suggesting that these effects are not due to the disruption of EBNA1-DNA binding



174 **(Supplementary Figs S3 and S4)**. Taken together, these findings indicate that EBNA1 can be  
175 hydroxylated on either K460 or K461, and that mutations in K460 reduces EBNA1 replication  
176 function, but not its ability to bind at *oriP*.

177

## 178 **Discussion**

179 EBNA1 is thought to be a highly stable protein in the nucleus of cells latently infected with EBV.  
180 Herein, we describe an EBNA1 interaction partner, PLOD1, that contributes to EBNA1 protein  
181 stability and essential functions in episome maintenance and DNA replication. We identified  
182 PLODs 1, 2, and 3 as EBNA1-associated proteins by LC-MS/MS and validated the interaction  
183 with PLOD1 antibody and colP experiments in transfected 293HEK, and with native proteins in  
184 latently infected LCLs and BL cells. We found that shRNA depletion of PLOD1 led to a loss of  
185 EBNA1 protein levels in various B-cell types tested. PLOD1 depletion also led to a loss of  
186 EBNA2, suggesting that it may have more EBV substrates than just EBNA1. A small molecule  
187 inhibitor of PLOD1, namely 2-DP, phenocopies the effects of PLOD1 depletion. 2-DP could also  
188 induce HIF1alpha in some cell types, but CoCl<sub>2</sub> induced hypoxia did not result in the same loss  
189 of EBNA1 protein stability. 2-DP and PLOD1 depletion led to loss of cell viability in an EBV-  
190 dependent manner. PLOD1 depletion led to a loss of EBV episomes in BL and LCL cells, as  
191 well as a loss of *oriP*-dependent DNA replication in HEK293 cells. Finally, we used mass  
192 spectrometry to identify EBNA1 peptides with mass/charge shifts consistent with lysine  
193 hydroxylation at K460 or K461. While mutations at K461 had only small effects on EBNA1  
194 replication activity, mutations of K460 strongly attenuated EBNA1 replication function. We  
195 conclude that PLOD1 regulates EBNA1 protein stabilization and function in regulation of EBV  
196 latency, that EBNA1 is hydroxylated on lysine K460 or K461, and that mutations in K461 lead to  
197 a loss of EBNA1 replication function.

198 PLOD1 and PLOD3 have previously been reported to interact with EBNA1 [24]. In this  
199 earlier study, PLOD1 was found to bind preferentially to EBNA1 with a polymorphism (T85A)

200 frequently associated with NPC and EBVaGC [24]. PLOD1 interaction with EBNA1 was found  
201 to be dependent on K83, a lysine residue in the N-terminal domain that also conforms to a  
202 consensus substrate for PLOD1 hydroxylation. EBNA1 N-terminal domain is involved in  
203 transcriptional activation, but it remains to be shown whether PLOD1 contributes to the  
204 transcriptional activation function of EBNA1. It was proposed that EBNA1 interaction with  
205 PLOD1 may sequester PLOD1 away from other substrates, such as procollagen, to drive  
206 tumorigenesis [24]. Our findings are mostly consistent with these previous findings, but provide  
207 new information on the role of PLODs in the regulation of EBNA1 protein stabilization and  
208 function in DNA replication and episome maintenance. Our data suggests that PLODs directly  
209 affect EBNA1 through post-translational modification and stabilization.

210 Overexpression of PLOD proteins have been implicated in several human cancers [17].  
211 Our findings suggest that PLOD1 can both bind and regulate EBNA1 protein stability. PLOD1  
212 depletion also led to large effects on EBV episome maintenance and *oriP* DNA replication,  
213 suggesting that PLOD1 binding or modification of EBNA1 may contribute to these activities  
214 beyond mere protein stabilization. Protein stabilization is integrally linked to many functions,  
215 including transcriptional activation [28] and replication origin function [29]. Protein hydroxylation  
216 of proline regulates HIF1A in the hypoxic response [30] and PLODs are well-characterized for  
217 modifying pro-collagen in the maturation of extracellular matrix [31]. PLODs utilize iron and  
218 alpha-ketoglutarate as cofactors, so it is likely that small molecules that alter these components,  
219 such as iron chelators, would have the potential to inhibit PLODs, as well as other iron-  
220 dependent enzymes. The precise role of PLODs in regulation of EBNA1 and potentially other  
221 EBV proteins, such as EBNA2, remain to be further investigated. Our findings suggest that a  
222 PLOD-dependent pathway is involved in maintaining EBNA1 stability and function, and that this  
223 may be exploited for disruption of EBV latency and treatment of EBV-associated disease.

224

225

226

227 **Materials and Methods**

228

229

230 **Cells, Plasmids, and shRNAs.**

231 EBV-positive Burkitt's lymphoma cells Mutul, Raji, Mutul virus-derived lymphoblastoid cell line  
232 (LCL) and, B95-8 LCL were grown in RPMI 1640 medium (Gibco BRL) containing 15% fetal  
233 bovine serum and antibiotics penicillin and streptomycin (50 U/ml). HEK 293T cells were culture  
234 in Dulbecco's modified Eagle's medium (DMEM) with 10% fetal bovine serum and antibiotics. All  
235 the cells were cultured at 37°C and 5% CO<sub>2</sub> environment. Mammalian expression vector for  
236 Flag-EBNA1 contained B95-8 EBNA1 lacking the GA repeats (aa 101-324) under the control of  
237 CMV-3XFLAG promoter in a plasmid derived from pREP10 (Clontech) containing, *oriP*, GFP,  
238 and hygromycin resistance [25]. Small hairpin RNAs (shRNAs) for Plod1 (shPlod1), and the  
239 control (shControl) were obtained from the Sigma/TRC (The RNAi Consortium) collection of  
240 targeted shRNA plasmid library (TRC no. 62248, 62249, 62259, 62251 and 62252). Lentivirus  
241 particles were generated in 293T-derived packaging cell lines.

242 **Drug Treatments**

243 Raji and LCLs ( $2 \times 10^5$  cells/ mL) were treated with vehicle control (DMSO; 0.016%, vol/vol) or  
244 2-DP (200  $\mu$ M) or 17-DMAG (1  $\mu$ M) or CoCl<sub>2</sub> (100  $\mu$ M) for 48 hr. Cells were harvested and the  
245 Western blots were performed. For MG132 studies cells were treated with either vehicle control  
246 (DMSO; 0.016%, vol/vol) or 2-DP (200  $\mu$ M) for 24 hr followed by adding MG132 to a final  
247 concentration of 10  $\mu$ M and continue the treatment for another 24 hr.

248

249 **Site-directed mutagenesis**

250 Primers were designed to generate the point mutations (K461A and K461R) in CMV Flag-  
251 EBNA1 containing oriP and hygromycin resistance plasmid (N2624). A two-stage PCR protocol  
252 for site-directed mutagenesis was adapted from Stratagene [25]. Following DpnI digestion and  
253 heat inactivation, PCR products were transformed into DH5 $\alpha$  cells. Purified plasmids from  
254 colonies were sequenced to confirm the mutation.

255

## 256 **Western blots**

257 The PVDF membranes were blotted with the following antibodies: anti- $\beta$ -actin-peroxidase  
258 (Catalog NO. A3854; Sigma-Aldrich), anti-EBNA1 mouse monoclonal antibody (Catalog NO. sc-  
259 81581; Scbt), and anti-Flag M2-peroxidase (horseradish peroxidase [HRP]) (Sigma-Aldrich, cat  
260 no. A8592), anti-PLOD1 rabbit polyclonal (Catalog NO. HPA039137; Millipore), anti-PLOD1  
261 rabbit polyclonal (Catalog NO. LS-C482920; LSBio), anti-EBNA2 rat polyclonal (Catalog NO.  
262 50175912; Fisher), anti-LMP1 mouse monoclonal (Catalog NO. M0897; Dako), anti-EBNA1  
263 rabbit polyclonal antibodies (custom prepared at Pocono Rabbit Farm), and imaging on a  
264 Amersham Imager 680.

265

## 266 **Chromatin Immunoprecipitation (ChIP)**

267 ChIP assays were performed as previously described [32]. Briefly, 293T (~1 x 10<sup>6</sup> cells) were  
268 plated in 10 cm dishes. 24 h later cells were transfected with Lipofectamine 2000 (12  $\mu$ l,  
269 Invitrogen) and 4  $\mu$ g *oriP* plasmids expressing either FLAG-B95-8 EBNA 1 or lysine mutation.  
270 Cells were split after 48 h, and then harvested at 72 h post transfection for ChIP assay. TaqMan  
271 qPCR performed using primers and probe designed by Thermo-Fisher at *oriP*. Antibodies used  
272 were as follows: anti-IgG mouse monoclonal (Santa Cruz Biotechnology), anti-Flag resin  
273 (Catalog NO. M8823; Sigma-Aldrich)

274

275 **Plasmid replication assays.**

276 Plasmid DNA replication assays have been described previously [25, 33]. Briefly, 293T (~1 x  
277 10<sup>6</sup> cells) were plated in 10 cm dishes. 24 h later cells were transfected with Lipofectamine 2000  
278 (12 µl, Invitrogen) and 4 µg *oriP* plasmids expressing either FLAG-B95-8 EBNA 1, with  
279 shPLOD1 or shControl plasmids. Cells were split after 48 h, and then harvested at 72 h post  
280 transfection for both episomal DNA and protein. Episomal DNA was extracted by Hirt Lysis [34].  
281 The DNA pellets were dissolved in 150 µl of 10 mM Tris HCl, 1 mM EDTA buffer (pH 7.6) and  
282 15 µl was subjected to restriction digestion with BamHI alone and 135 µl was subjected to  
283 BamHI and DpnI digestion overnight at 37° C. DNA was extracted with phenol: chloroform (1:1),  
284 precipitated, and electrophoresed on a 0.9% agarose gel and transferred to a nylon membrane  
285 (PerkinElmer) for southern blotting. Blots were visualized and quantified using a Typhoon 9410

286

287 **shRNA-mediated knockdown of PLOD1.**

288 EBV-positive cells were infected by spin infection with lentivirus expressing shPLOD1, or  
289 shControl shRNA. At 48 h post-infection, 1.0 to 2.5 µg/ml puromycin was added to the media,  
290 and cell pools were selected for puromycin resistance. pLKO.1 vector-based shRNA constructs  
291 for were generated with target sequence 5'-T -3' (shPLOD1). shControl was generated in  
292 pLKO.1 vector with target sequence 5'-TTATCGCGCATATCACGCG-3'. Lentiviruses were  
293 produced by cotransfection with envelope and packaging vectors pMD2.G and pSPAX2 in 293T  
294 cells. Mutul, Raji, or LCL cells were infected with lentiviruses carrying pLKO.1-puro vectors by  
295 spin-infection at 450 g for 90 minutes at room temperature. The cell pellets were resuspended  
296 and incubated in fresh RPMI medium, then treated with 2.5 µg/ml puromycin at 48 hrs after the  
297 infection. The RPMI medium with 2.5 µg/ml puromycin was replaced every 2 to 3 days. The  
298 cells were collected after 7 days of puromycin selection, then subject to following assays.

299

300

301

302 **EBV episome maintenance by pulsed-field electrophoresis.**

303 Mutul, Raji, and LCLs were infected with lentivirus. After 5 days of puromycin selection, cells  
304 were resuspended in 1× phosphate-buffered saline (PBS) and an equal amount of 2% agarose  
305 to form agarose plugs containing  $1 \times 10^6$  cells that were then incubated for 48 h at 50°C in lysis  
306 buffer (0.2 M EDTA [pH 8.0], 1% sodium lauryl sulfate, 1 mg/ml proteinase K). The agarose  
307 plugs were washed twice in TE buffer (10 mM Tris [pH 7.5] and 1 mM EDTA). Pulsed-field gel  
308 electrophoresis (PFGE) was performed for 23 h at 14°C with an initial switch time of 60 s and a  
309 final switch time of 120 s at 6 V/cm and an included angle of 120° as described previously (Bio-  
310 Rad CHEF Mapper) [35]. DNA was transferred to nylon membranes by established methods for  
311 Southern blotting [36]. The DNA was then detected by hybridization with  $\alpha$ -<sup>32</sup>P-labeled probe  
312 specific for the EBV WP region and visualized with a Typhoon 9410 variable-mode imager (GE  
313 Healthcare Life Sciences).

314

315 **Immunoprecipitation**

316 Cells were extracted with lysis buffer (20 mM Tris-HCl [pH 7.4], 1 mM EDTA, 0.1 mM EGTA, 2  
317 mM MgCl<sub>2</sub>, 150 mM NaCl, 1 mM Na<sub>3</sub>VO<sub>4</sub>, 1 mM NaF, 20 mM sodium glycerophosphate, 5%  
318 glycerol, 1% Triton X-100, 0.5% sodium dodecyl sulfate, 1× protease inhibitors [Sigma], 1×  
319 phosphatase inhibitors [Sigma], and 1 mM phenylmethylsulfonyl fluoride [PMSF]). After rotation  
320 for 60 min at 4°C, the lysate was centrifuged for 20 min at 16,000 × g, and the supernatant was  
321 recovered. The cleared extracts were used for immunoprecipitation with antibodies as indicated  
322 in the figures.

323

324 **RNA analysis**

325 Total RNA was extracted from EBV positive cells using TRIzol (Ambion) and then further treated  
326 with DNase I (New England Biolabs). Two micrograms of total RNA were reverse transcribed  
327 using random decamers (Ambion) and Superscript IV RNase H<sup>-</sup> reverse transcriptase  
328 (Invitrogen). Specific primer sets were used in real-time quantitative PCR (qPCR) assays to  
329 measure Plod1a, Plod1b, Plod2 and, Plod3 levels. The values for the relative levels were  
330 calculated by  $\Delta\Delta CT$  method.

331

332 **Flag-EBNA1 purification**

333 293T cells were transfected with pCMV-Flag-EBNA1 OriP or Flag Vector plasmids. The cells  
334 were collected after 10 days post-transfection and washed once in 1X PBS. Cells ( $\sim 10^8$ ) were  
335 lysed in 50 ml of Lysis buffer (50 mM Tris pH 7.5, 150 mM NaCl, 0.5% Nonidet P40, 0.5% SDS,  
336 1 mM EDTA), 1 mM PMSF, Protease inhibitors (Catalog NO. P8340; Sigma-Aldrich) and  
337 Phosphatase inhibitors (Catalog NO. 4906837001; Roche). Lysate were spin at 16000 for 10  
338 min and immunoprecipitated with 100  $\mu$ l of Anti-Flag resin (Catalog NO. M8823; Sigma-Aldrich).  
339 Complexes were washed three times with lysis buffer containing 300 mM NaCl, 1 mM PMSF,  
340 Protease inhibitors (Catalog NO. P8340; Sigma-Aldrich) and Phosphatase inhibitors (Catalog  
341 NO. 4906837001; Roche), and eluted with Flag peptide.  
342 For EBNA 1 bound protein identification, 30 mg of Flag EBNA 1 complexes were run on a 10%  
343 precast gel (Invitrogen) for 1.5 cm and the gel was Coomassie stained. The entire stained gel  
344 regions were excised and digested with trypsin. Liquid chromatography tandem mass  
345 spectrometry (LC-MS/MS) analysis was performed using a Q Exactive HF mass spectrometer  
346 (ThermoFisher Scientific) coupled with a Nano-ACQUITY UPLC system (Waters). Samples  
347 were injected onto a UPLC Symmetry trap column (180  $\mu$ m i.d. x 2 cm packed with 5  $\mu$ m C18

348 resin; Waters), and peptides were separated by reversed phase HPLC on a BEH C18  
349 nanocapillary analytical column (75  $\mu\text{m}$  i.d. x 25 cm, 1.7  $\mu\text{m}$  particle size; Waters) using a 2-h  
350 gradient formed by solvent A (0.1% formic acid in water) and solvent B (0.1% formic acid in  
351 acetonitrile). Eluted peptides were analyzed by the mass spectrometer set to repetitively scan  
352 m/z from 400 to 2000 in positive ion mode. The full MS scan was collected at 60,000 resolution  
353 followed by data-dependent MS/MS scans at 15,000 resolution on the 20 most abundant ions  
354 exceeding a minimum threshold of 20,000. Peptide match was set as preferred, exclude isotope  
355 option and charge-state screening were enabled to reject unassigned and single charged ions.  
356 Peptide sequences were identified using MaxQuant 1.5.2.8 [37]. MS/MS spectra were searched  
357 against a UniProt human protein database, EBNA1 protein sequence and a common  
358 contaminants database using full tryptic specificity with up to two missed cleavages, static  
359 carbamidomethylation of Cys, variable oxidation of Met, and variable protein N-terminal  
360 acetylation. Consensus identification lists were generated with false discovery rates set at 1%  
361 for protein and peptide identifications. Fold change was calculated using the protein intensity  
362 values.

363

### 364 **Mass Spectrometry**

365

366 To identify post-translation modifications of EBNA 1, Flag-EBNA 1 complexes were washed  
367 three times with buffer contains 500 mM NaCl then Flag-EBNA 1 was eluted with 3X flag  
368 peptide and electrophoresed into an SDS-gel for a short distance. Gel regions containing Flag-  
369 EBNA 1 were digested separately with trypsin and chymotrypsin. Digests were analyzed by LC-  
370 MS/MS as described above. The MS data were searched using MaxQuant 1.6.2.3 [37].  
371 Modifications searched were static carbamidomethylation of Cys, and variable Met oxidation,  
372 lysine hydroxylation, proline hydroxylation and protein N-terminal acetylation. Consensus



373 identification lists were generated with false discovery rates set at 1% for protein, peptide, and  
374 site identifications.

375

### 376 **Cell viability assays**

377 Cell viability was assessed 72 hours after 2'2-dipyridyl treatment using Resazurin cell  
378 proliferation/viability assay. In brief, EBV positive and negative cells were seeded onto 96-well  
379 plates and cultured overnight, followed by treatment over a ten-point concentration range of  
380 two-fold dilutions of 2'2-dipyridyl (0.39mM, 0.781mM, 1.56mM, 3.12mM, 6.25mM, 12,5 mM, 25  
381 mM, 50 mM, 100 mM, 200 mM) (Sigma) plated in quadruplicate wells in 200  $\mu$ L RPMI 1640  
382 medium supplemented with 10% fetal bovine serum for 72 hours. As positive and negative  
383 controls, DMSO alone (0.4%) and puromycin (20  $\mu$ g/ml) treated wells, respectively, were also  
384 plated in quadruplicate wells. At the end of the treatment, 20  $\mu$ L of 500 mM Resazurin solution  
385 was added to each well and incubated for 6 hours at 37°C. The absorbance of each well was  
386 then detected at 590 nm under a microplate reader (CLARIOstarPlus, BMG Labtech). Cell  
387 viability was calculated as the ratio of the absorbance value to that of the control group (%)  
388 treated with 20 mg /ml puromycin.

389

### 390 **Cell apoptosis assay with flow cytometry**

391 Apoptotic cells were detected using the FITC Annexin V Apoptosis Detection Kit (cat# ab14085,  
392 Abcam). EBV positive and negative cells were infected with lentivirus shCtrl or shplod1. After 48  
393 hours post infection puromycin was added and selection for 3 days. The cells were then stained  
394 with Annexin V-FITC and PI according to the manufacturer's instructions and the LSR14 Flow  
395 Cytometer (BD Biosciences). Cells were identified as viable, dead, or early or late apoptotic  
396 cells, and the percent decrease in live cell population (Q4: Annexin V(-)PI(-) was calculated as  
397  $[Q4 \text{ control} - Q4 \text{ treated} / Q4 \text{ control}] \times 100$  under each experimental condition.

398

399

400 **Data Availability**

401 All data is available in the manuscript or supplementary data files.

402

403

404 **Acknowledgements**

405 We thank members of the Wistar Cancer Center Cores in Proteomics, Genomics, and Flow

406 Cytometry for their excellent technical support. This work was supported by grants from NIH

407 DE017336, AI53508, CA140652, CA093606 to PML, R50 CA221838 to HYT and P30 Cancer

408 Center Support Grant P30 CA010815 to the Wistar Institute (D. Altieri).

409

410

411

## 412 References

- 413 1. Shannon-Lowe C, Rickinson A. The Global Landscape of EBV-Associated Tumors. *Front*  
414 *Oncol.* 2019;9:713. Epub 2019/08/27. doi: 10.3389/fonc.2019.00713. PubMed PMID:  
415 31448229; PubMed Central PMCID: PMC6691157.
- 416 2. Thorley-Lawson DA. EBV Persistence--Introducing the Virus. *Curr Top Microbiol*  
417 *Immunol.* 2015;390(Pt 1):151-209. Epub 2015/10/02. doi: 10.1007/978-3-319-22822-8\_8.  
418 PubMed PMID: 26424647; PubMed Central PMCID: PMC6691157.
- 419 3. Young LS, Yap LF, Murray PG. Epstein-Barr virus: more than 50 years old and still  
420 providing surprises. *Nat Rev Cancer.* 2016;16(12):789-802. Epub 2016/11/04. doi:  
421 10.1038/nrc.2016.92. PubMed PMID: 27687982.
- 422 4. Wen KW, Wang L, Menke JR, Damania B. Cancers associated with human  
423 gammaherpesviruses. *FEBS J.* 2021. Epub 2021/09/19. doi: 10.1111/febs.16206. PubMed PMID:  
424 34536980.
- 425 5. Farrell PJ. Epstein-Barr Virus and Cancer. *Annu Rev Pathol.* 2019;14:29-53. Epub  
426 2018/08/21. doi: 10.1146/annurev-pathmechdis-012418-013023. PubMed PMID: 30125149.
- 427 6. Bjornevik K, Cortese M, Healy BC, Kuhle J, Mina MJ, Leng Y, et al. Longitudinal analysis  
428 reveals high prevalence of Epstein-Barr virus associated with multiple sclerosis. *Science.*  
429 2022;375(6578):296-301. Epub 2022/01/14. doi: 10.1126/science.abj8222. PubMed PMID:  
430 35025605.
- 431 7. Lanz TV, Brewer RC, Ho PP, Moon JS, Jude KM, Fernandez D, et al. Clonally expanded B  
432 cells in multiple sclerosis bind EBV EBNA1 and GlialCAM. *Nature.* 2022. Epub 2022/01/25. doi:  
433 10.1038/s41586-022-04432-7. PubMed PMID: 35073561.
- 434 8. De Leo A, Calderon A, Lieberman PM. Control of Viral Latency by Episome Maintenance  
435 Proteins. *Trends Microbiol.* 2020;28(2):150-62. Epub 2019/10/19. doi:  
436 10.1016/j.tim.2019.09.002. PubMed PMID: 31624007; PubMed Central PMCID:  
437 PMC6691157.
- 438 9. Frappier L. Ebna1. *Curr Top Microbiol Immunol.* 2015;391:3-34. Epub 2015/10/03. doi:  
439 10.1007/978-3-319-22834-1\_1. PubMed PMID: 26428370.
- 440 10. Sivachandran N, Cao JY, Frappier L. Epstein-Barr virus nuclear antigen 1 Hijacks the host  
441 kinase CK2 to disrupt PML nuclear bodies. *J Virol.* 2010;84(21):11113-23. Epub 2010/08/20. doi:  
442 10.1128/JVI.01183-10. PubMed PMID: 20719947; PubMed Central PMCID: PMC2953151.
- 443 11. Saridakis V, Sheng Y, Sarkari F, Holowaty MN, Shire K, Nguyen T, et al. Structure of the  
444 p53 binding domain of HAUSP/USP7 bound to Epstein-Barr nuclear antigen 1 implications for  
445 EBV-mediated immortalization. *Mol Cell.* 2005;18(1):25-36. Epub 2005/04/06. doi:  
446 10.1016/j.molcel.2005.02.029. PubMed PMID: 15808506.
- 447 12. Holowaty MN, Sheng Y, Nguyen T, Arrowsmith C, Frappier L. Protein interaction domains  
448 of the ubiquitin-specific protease, USP7/HAUSP. *J Biol Chem.* 2003;278(48):47753-61. Epub  
449 2003/09/25. doi: 10.1074/jbc.M307200200. PubMed PMID: 14506283.
- 450 13. Levitskaya J, Sharipo A, Leonchiks A, Ciechanover A, Masucci MG. Inhibition of  
451 ubiquitin/proteasome-dependent protein degradation by the Gly-Ala repeat domain of the  
452 Epstein-Barr virus nuclear antigen 1. *Proc Natl Acad Sci U S A.* 1997;94(23):12616-21. Epub  
453 1997/11/14. doi: 10.1073/pnas.94.23.12616. PubMed PMID: 9356498; PubMed Central PMCID:  
454 PMC25057.

- 455 14. Tellam J, Sherritt M, Thomson S, Tellam R, Moss DJ, Burrows SR, et al. Targeting of  
456 EBNA1 for rapid intracellular degradation overrides the inhibitory effects of the Gly-Ala repeat  
457 domain and restores CD8+ T cell recognition. *J Biol Chem*. 2001;276(36):33353-60. Epub  
458 2001/07/04. doi: 10.1074/jbc.M104535200. PubMed PMID: 11435434.
- 459 15. Coppotelli G, Mughal N, Masucci MG. The Gly-Ala repeat modulates the interaction of  
460 Epstein-Barr virus nuclear antigen-1 with cellular chromatin. *Biochem Biophys Res Commun*.  
461 2013;431(4):706-11. Epub 2013/01/26. doi: 10.1016/j.bbrc.2013.01.054. PubMed PMID:  
462 23348225.
- 463 16. Wang Y, Du S, Zhu C, Wang C, Yu N, Lin Z, et al. STUB1 is targeted by the SUMO-  
464 interacting motif of EBNA1 to maintain Epstein-Barr Virus latency. *PLoS Pathog*.  
465 2020;16(3):e1008447. Epub 2020/03/17. doi: 10.1371/journal.ppat.1008447. PubMed PMID:  
466 32176739; PubMed Central PMCID: PMC7105294.
- 467 17. Qi Y, Xu R. Roles of PLODs in Collagen Synthesis and Cancer Progression. *Front Cell Dev*  
468 *Biol*. 2018;6:66. Epub 2018/07/14. doi: 10.3389/fcell.2018.00066. PubMed PMID: 30003082;  
469 PubMed Central PMCID: PMC6031748.
- 470 18. Rohrbach M, Vandersteen A, Yis U, Serdaroglu G, Ataman E, Chopra M, et al. Phenotypic  
471 variability of the kyphoscoliotic type of Ehlers-Danlos syndrome (EDS VIA): clinical, molecular  
472 and biochemical delineation. *Orphanet J Rare Dis*. 2011;6:46. Epub 2011/06/28. doi:  
473 10.1186/1750-1172-6-46. PubMed PMID: 21699693; PubMed Central PMCID:  
474 PMC3135503.
- 475 19. Li SS, Lian YF, Huang YL, Huang YH, Xiao J. Overexpressing PLOD family genes predict  
476 poor prognosis in gastric cancer. *J Cancer*. 2020;11(1):121-31. Epub 2020/01/02. doi:  
477 10.7150/jca.35763. PubMed PMID: 31892979; PubMed Central PMCID: PMC6930397.
- 478 20. Chang WH, Forde D, Lai AG. Dual prognostic role of 2-oxoglutarate-dependent  
479 oxygenases in ten cancer types: implications for cell cycle regulation and cell adhesion  
480 maintenance. *Cancer Commun (Lond)*. 2019;39(1):23. Epub 2019/05/01. doi: 10.1186/s40880-  
481 019-0369-5. PubMed PMID: 31036064; PubMed Central PMCID: PMC6489267.
- 482 21. Wang D, Zhang S, Chen F. High Expression of PLOD1 Drives Tumorigenesis and Affects  
483 Clinical Outcome in Gastrointestinal Carcinoma. *Genet Test Mol Biomarkers*. 2018;22(6):366-73.  
484 Epub 2018/05/04. doi: 10.1089/gtmb.2018.0009. PubMed PMID: 29723071.
- 485 22. Jiang SS, Ke SJ, Ke ZL, Li J, Li X, Xie XW. Cell Division Cycle Associated Genes as Diagnostic  
486 and Prognostic Biomarkers in Hepatocellular Carcinoma. *Front Mol Biosci*. 2021;8:657161. Epub  
487 2021/03/30. doi: 10.3389/fmolb.2021.657161. PubMed PMID: 33778011; PubMed Central  
488 PMCID: PMC7991583.
- 489 23. Yang B, Zhao Y, Wang L, Zhao Y, Wei L, Chen D, et al. Identification of PLOD Family  
490 Genes as Novel Prognostic Biomarkers for Hepatocellular Carcinoma. *Front Oncol*.  
491 2020;10:1695. Epub 2020/10/06. doi: 10.3389/fonc.2020.01695. PubMed PMID: 33014843;  
492 PubMed Central PMCID: PMC7509443.
- 493 24. Shire K, Marcon E, Greenblatt J, Frappier L. Characterization of a cancer-associated  
494 Epstein-Barr virus EBNA1 variant reveals a novel interaction with PLOD1 and PLOD3. *Virology*.  
495 2021;562:103-9. Epub 2021/07/26. doi: 10.1016/j.virol.2021.07.009. PubMed PMID: 34304093.
- 496 25. Dheekollu J, Malecka K, Wiedmer A, Delecluse HJ, Chiang AK, Altieri DC, et al.  
497 Carcinoma-risk variant of EBNA1 deregulates Epstein-Barr Virus episomal latency. *Oncotarget*.

- 498 2017;8(5):7248-64. Epub 2017/01/13. doi: 10.18632/oncotarget.14540. PubMed PMID:  
499 28077791; PubMed Central PMCID: PMCPMC5352318.
- 500 26. Jover E, Silvente A, Marin F, Martinez-Gonzalez J, Orriols M, Martinez CM, et al.  
501 Inhibition of enzymes involved in collagen cross-linking reduces vascular smooth muscle cell  
502 calcification. *FASEB J.* 2018;32(8):4459-69. Epub 2018/03/17. doi: 10.1096/fj.201700653R.  
503 PubMed PMID: 29547702.
- 504 27. Sun X, Barlow EA, Ma S, Hagemeyer SR, Duellman SJ, Burgess RR, et al. Hsp90 inhibitors  
505 block outgrowth of EBV-infected malignant cells in vitro and in vivo through an EBNA1-  
506 dependent mechanism. *Proc Natl Acad Sci U S A.* 2010;107(7):3146-51. Epub 2010/02/06. doi:  
507 10.1073/pnas.0910717107. PubMed PMID: 20133771; PubMed Central PMCID:  
508 PMCPMC2840277.
- 509 28. Geng F, Wenzel S, Tansey WP. Ubiquitin and proteasomes in transcription. *Annu Rev*  
510 *Biochem.* 2012;81:177-201. Epub 2012/03/13. doi: 10.1146/annurev-biochem-052110-120012.  
511 PubMed PMID: 22404630; PubMed Central PMCID: PMCPMC3637986.
- 512 29. Li Z, Xu X. Post-Translational Modifications of the Mini-Chromosome Maintenance  
513 Proteins in DNA Replication. *Genes (Basel).* 2019;10(5). Epub 2019/05/06. doi:  
514 10.3390/genes10050331. PubMed PMID: 31052337; PubMed Central PMCID:  
515 PMCPMC6563057.
- 516 30. Strowitzki MJ, Cummins EP, Taylor CT. Protein Hydroxylation by Hypoxia-Inducible  
517 Factor (HIF) Hydroxylases: Unique or Ubiquitous? *Cells.* 2019;8(5). Epub 2019/05/01. doi:  
518 10.3390/cells8050384. PubMed PMID: 31035491; PubMed Central PMCID: PMCPMC6562979.
- 519 31. Myllyla R, Wang C, Heikkinen J, Juffer A, Lampela O, Risteli M, et al. Expanding the lysyl  
520 hydroxylase toolbox: new insights into the localization and activities of lysyl hydroxylase 3  
521 (LH3). *J Cell Physiol.* 2007;212(2):323-9. Epub 2007/05/23. doi: 10.1002/jcp.21036. PubMed  
522 PMID: 17516569.
- 523 32. Chau CM, Lieberman PM. Dynamic chromatin boundaries delineate a latency control  
524 region of Epstein-Barr virus. *J Virol.* 2004;78(22):12308-19. Epub 2004/10/28. doi:  
525 10.1128/JVI.78.22.12308-12319.2004. PubMed PMID: 15507618; PubMed Central PMCID:  
526 PMCPMC525066.
- 527 33. Deng Z, Atanasiu C, Burg JS, Broccoli D, Lieberman PM. Telomere repeat binding factors  
528 TRF1, TRF2, and hRAP1 modulate replication of Epstein-Barr virus OriP. *J Virol.*  
529 2003;77(22):11992-2001. Epub 2003/10/29. doi: 10.1128/jvi.77.22.11992-12001.2003. PubMed  
530 PMID: 14581536; PubMed Central PMCID: PMCPMC254251.
- 531 34. Hirt B. Selective extraction of polyoma DNA from infected mouse cell cultures. *J Mol*  
532 *Biol.* 1967;26(2):365-9. Epub 1967/06/14. doi: 10.1016/0022-2836(67)90307-5. PubMed PMID:  
533 4291934.
- 534 35. Johnson PG, Beerman TA. Damage induced in episomal EBV DNA in Raji cells by  
535 antitumor drugs as measured by pulsed field gel electrophoresis. *Anal Biochem.*  
536 1994;220(1):103-14. Epub 1994/07/01. doi: 10.1006/abio.1994.1305. PubMed PMID: 7526729.
- 537 36. Maniatis T, Fritsch EF, Sambrook J. Molecular cloning : a laboratory manual. Cold Spring  
538 Harbor, N.Y.: Cold Spring Harbor Laboratory; 1982. x, 545 p. p.
- 539 37. Cox J, Mann M. MaxQuant enables high peptide identification rates, individualized  
540 p.p.b.-range mass accuracies and proteome-wide protein quantification. *Nat Biotechnol.*  
541 2008;26(12):1367-72. Epub 2008/11/26. doi: 10.1038/nbt.1511. PubMed PMID: 19029910.



543 **Figure Legends**

544

545 **Figure 1. Identification of PLODs as EBNA1 interaction partners. A)** FLAG-affinity purified  
546 proteins from HEK293T cells with stable expression of FLAG-EBNA1 or FLAG-Vector from *oriP*  
547 plasmids were analyzed by silver stain (left) or FLAG Western blot (WB, right). **B)** LC-MS/MS  
548 analysis of FLAG-EBNA1 associated proteins highlighting numbers of peptides identified for  
549 USP7, PLOD1, PLOD2, PLOD3, and P4HA2. **C)** Immunoprecipitation (IP) with EBNA1 or IgG  
550 control antibody from Raji (left) or Mutul (right) total cell extracts probed by Western blot with  
551 antibody to PLOD1. **D)** Same as in C, except reciprocal IP with PLOD1 antibody probed with  
552 antibody to EBNA1. \* indicates a slower mobility form of EBNA1.

553

554 **Figure 2. PLOD shRNA depletion and small molecule inhibition with 2-DP destabilize**  
555 **EBNA1 protein. A)** Raji cells transduced with lentivirus shControl (shCtrl) or shPLOD1.a were  
556 assayed by Western blot for PLOD1, EBNA1, EBNA2, LMP1, or Actin. Each lane is a biological  
557 replicate. **B)** Raji (left) or LCL (right) treated with DMSO or 2,2'-dipyridil (2-DP, 200  $\mu$ M) were  
558 assayed by Western blot for PLOD1, EBNA1, EBNA2, LMP1, or Actin. **C)** Raji (left) or LCL  
559 (right) were treated with DMSO, 2-DP (200  $\mu$ M), 2-DP+MG132 (10  $\mu$ M), or 17-DMGA (1  $\mu$ M) for  
560 48 hrs and assayed by Western blot for EBNA1 (top) or Actin (bottom). **D)** Raji (left) or LCL  
561 (right) were treated with DMSO, 2-DP (200  $\mu$ M), or CoCl<sub>2</sub> (100  $\mu$ M) for 48 hrs followed by  
562 Western blot for PLOD1, EBNA1, HIF1 $\alpha$ , or Actin.

563

564 **Figure 3. Selective inhibition of EBV-positive cells to PLOD1 depletion or inhibition by 2-**  
565 **DP. A)** Flow cytometry analysis of cell viability using Propidium Iodide (PI, y-axis) and Annexin  
566 V (x-axis) for DG75, BJAB, Mutul, Raji, B95.8LCL transduced with control shRNA or PLOD1  
567 shRNA. **B)** Quantification of the % decrease in live cells in treatments described in panel A.

568 EBV positive cells (red bars), EBV negative cells (blue bars). **C)** Same as in panel A, except  
569 treatment with DMSO or 2-DP (200  $\mu$ M). **D)** Quantification of the % decrease in live cells in  
570 treatments described in panel C. P-values determined by ordinary one-way ANOVA and  
571 Dunnett's multiple comparison test \*\*\*\*<0.0001, \*\*<0.01, \*=0.0108.

572

573 **Figure 4. PLOD depletion causes loss of EBV episomes.** **A)** PFGE analysis of Mutul, Raji,  
574 or B95-8 or Mutu LCLs transduced with lentivirus expressing shCtrl or shPLOD1 and analyzed  
575 by Southern blot for Genomic DNA (top) or EBV BamHI W repeat (lower panel) indicating viral  
576 episomes or linear genomes. **B)** Quantification EBV episomes from PFGE shown in panel C.  
577 P-values determined by ordinary one-way ANOVA and Dunnett's multiple comparison test  
578 \*\*\*\*<0.0001, \*=0.0108.

579

580 **Figure 5. PLOD depletion inhibits EBNA1-dependent DNA replication of oriP plasmids.**

581 **A)** HEK293T cells transfected with oriP plasmids expressing FLAG-EBNA1 were transfected  
582 with expression vectors for shCtrl, shPLOD1.a, shPLOD1.b and assayed by Western blot for  
583 PLOD1 (top), FLAG-EBNA1 (middle) or Actin (bottom). **B)** oriP-plasmid replication for cells  
584 treated as in panel A assayed by Southern blot after BamHI digest (left) or DpnI/BamHI (right).  
585 Undigested linear oriP plasmid DNA is indicated. Each lane represents a biological duplicate.  
586 **C)** Quantification of % replicated oriP DNA for experiments shown in panel B.

587

588 **Figure 6. Evidence for lysine hydroxylation of EBNA1.** **A)** Mass spectrometry (MS) of  
589 EBNA1 peptide with a mass/charge shift consistent with lysine hydroxylation. Consensus  
590 PLOD1 substrate recognition site at K461 highlighted in red. **B)** MS/MS spectrum of EBNA1  
591 peptide with hydroxylation. **C)** MS/MS spectrum of the unmodified EBNA1 peptide. **D)** Western  
592 blot analysis of EBNA1 Wt, K461A, or K461R expressed in HEK293T cells. **E)** Southern blot  
593 analysis of oriP-dependent DNA replication for EBNA1 Wt, K461A, or K461R. **F)** Quantification



594 of % oriP DNA replication shown in panel E. **G)** Western blot analysis of EBNA1 Wt, K460A, or  
595 K460R expressed in HEK293T cells. **H)** Southern blot analysis of *oriP*-dependent DNA  
596 replication for EBNA1 Wt, K460A, or K460R. **I)** Quantification of % *oriP* DNA replication shown  
597 in panel E. P-values determined by ordinary one-way ANOVA and Dunnett's multiple  
598 comparison test \*\*\*\*<0.0001

599

600

601 **Figure 1**

602

603

604

605

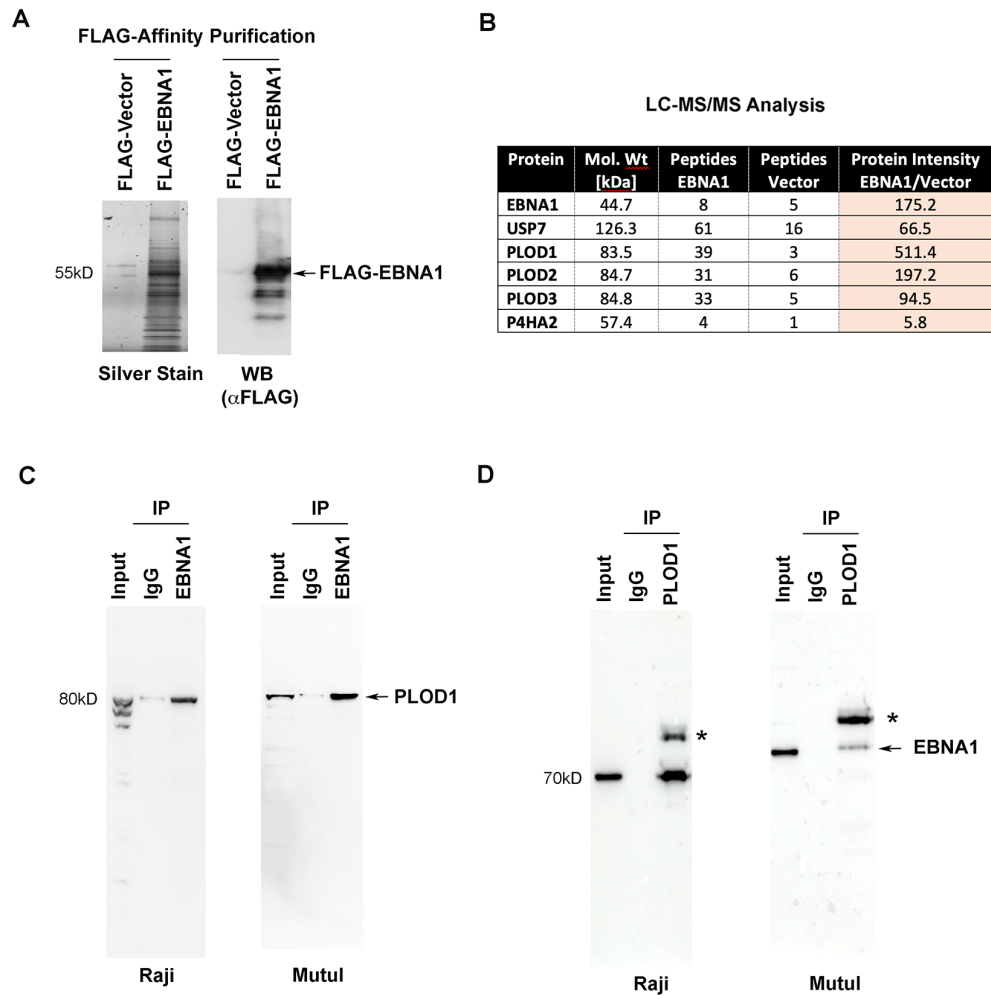

606 **Figure 2**

607

608

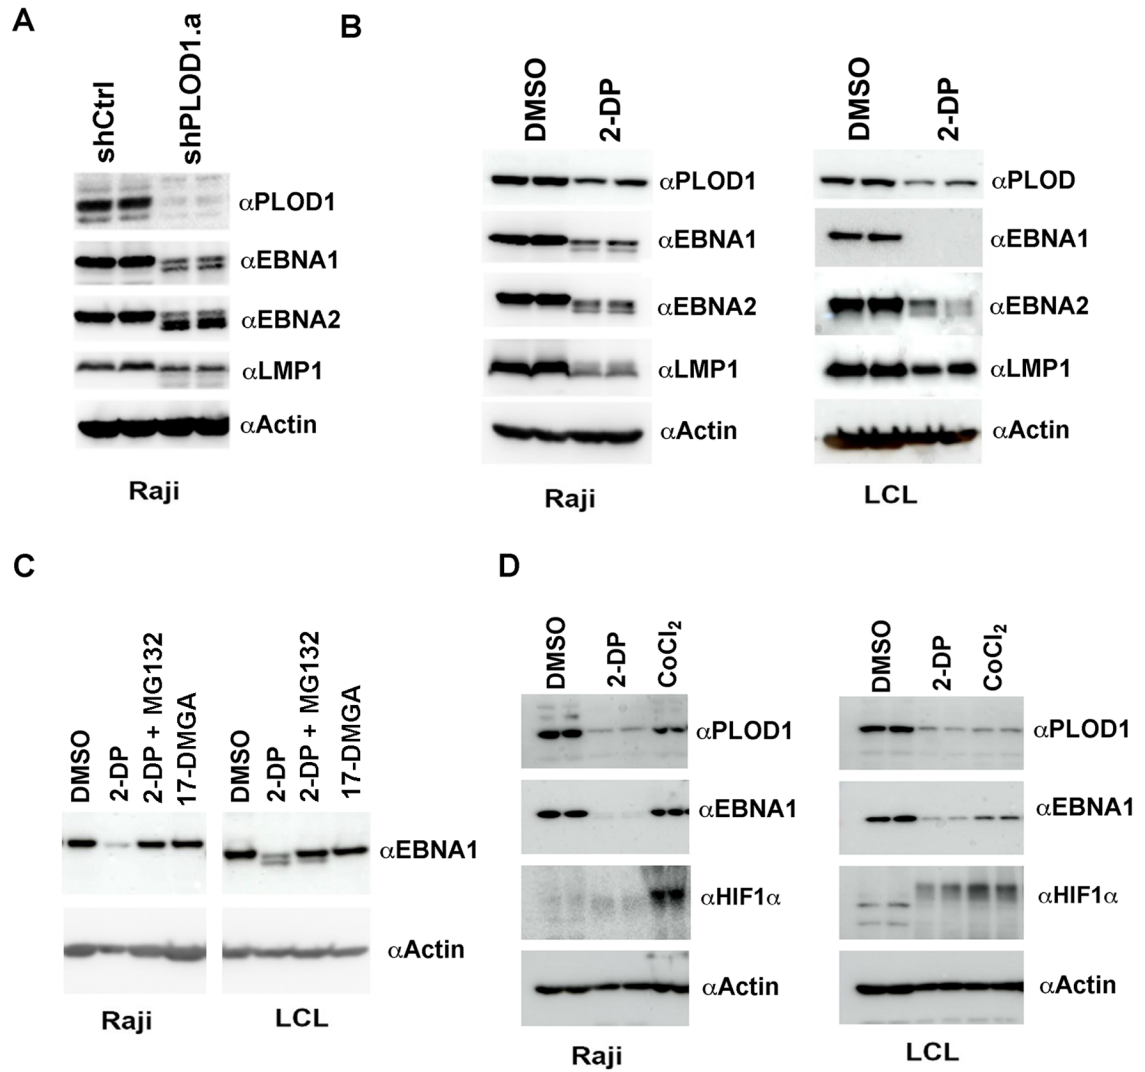

609 **Figure 3**

610

611

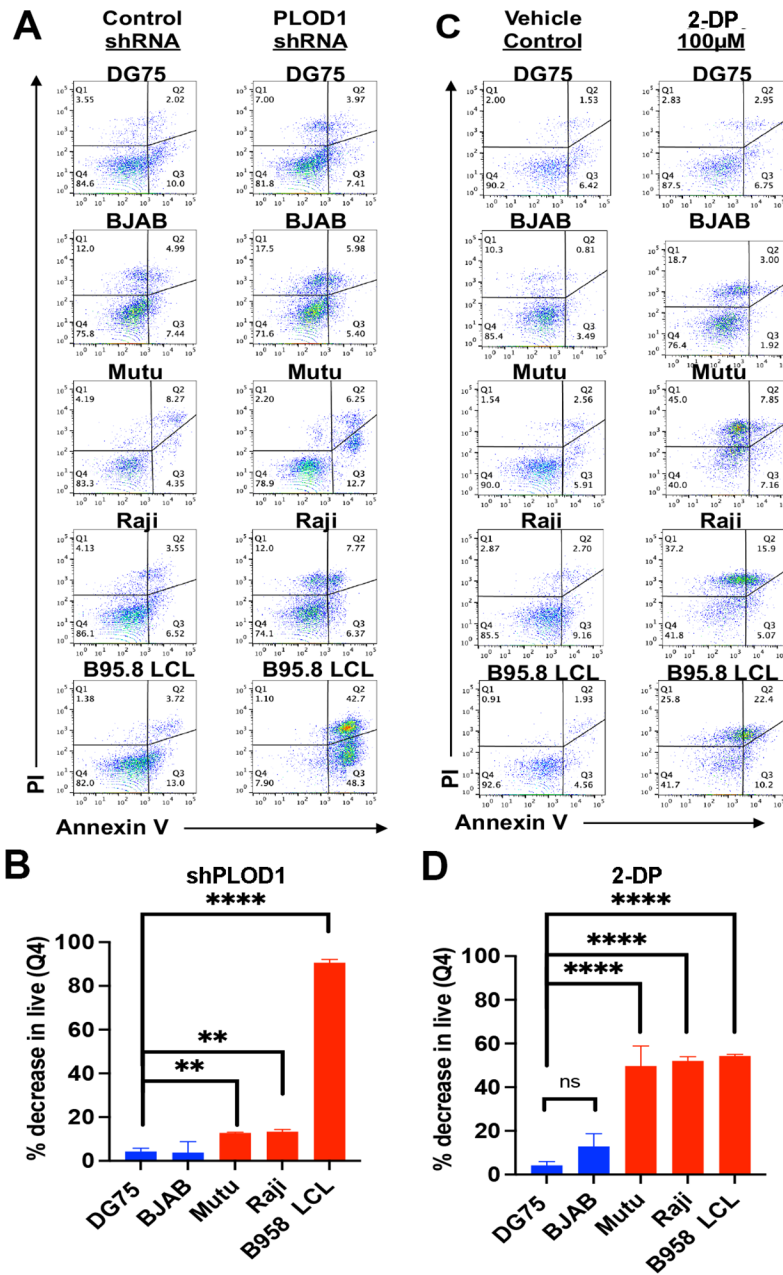

614 **Figure 4**

615

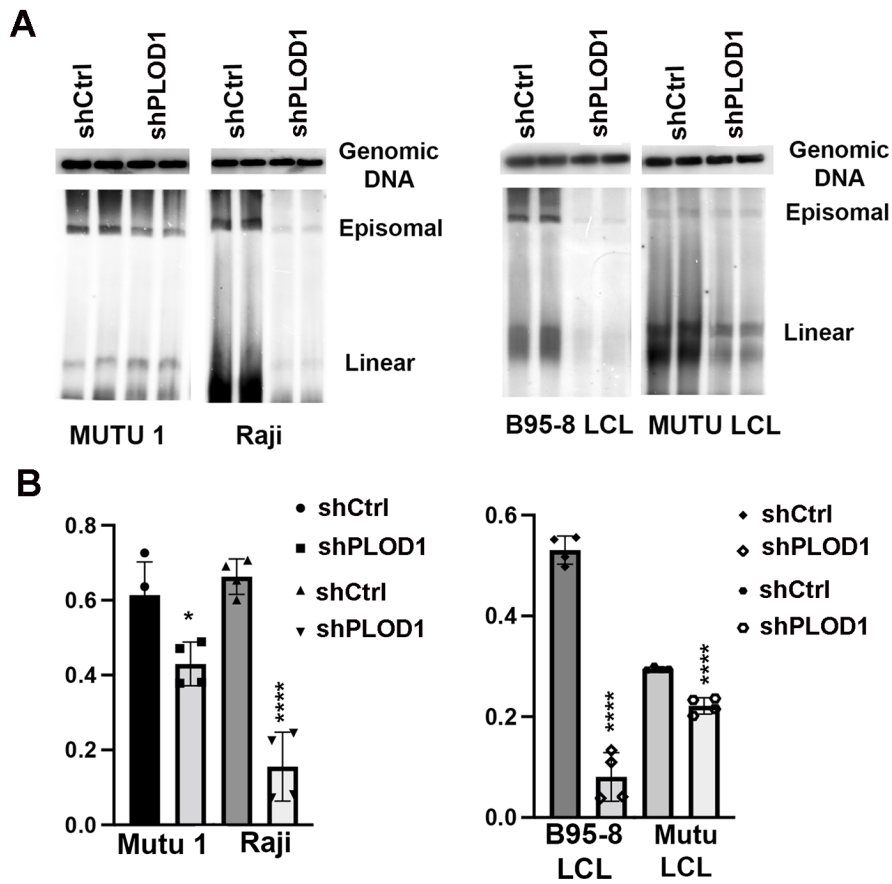

616

617

618

619 **Figure 5**

620

621

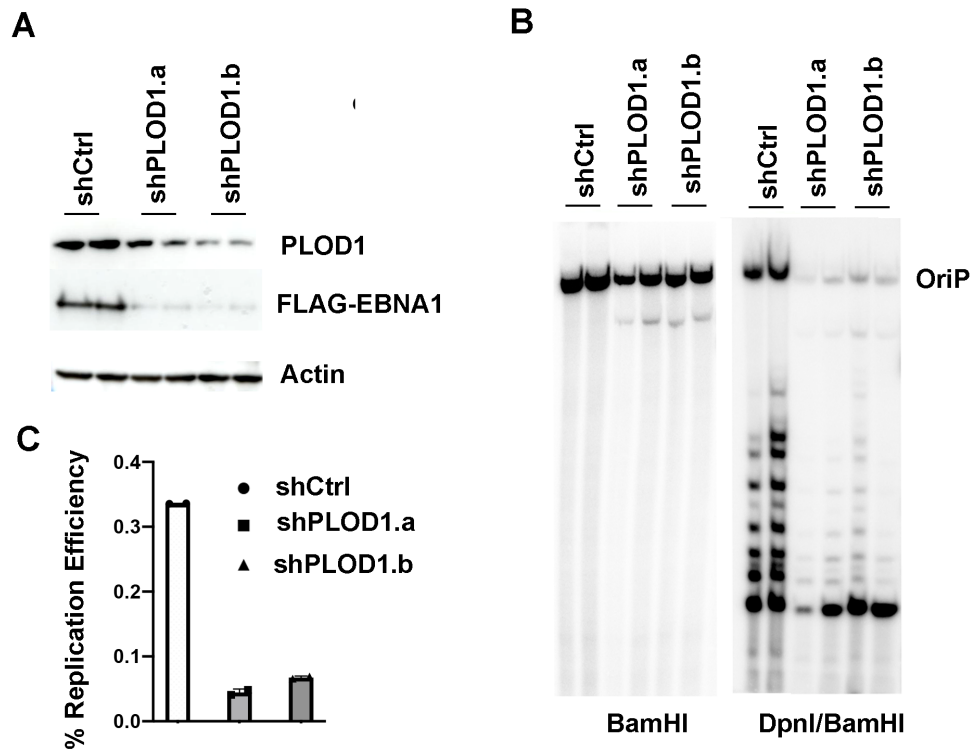

622

623

624 **Figure 6**

625

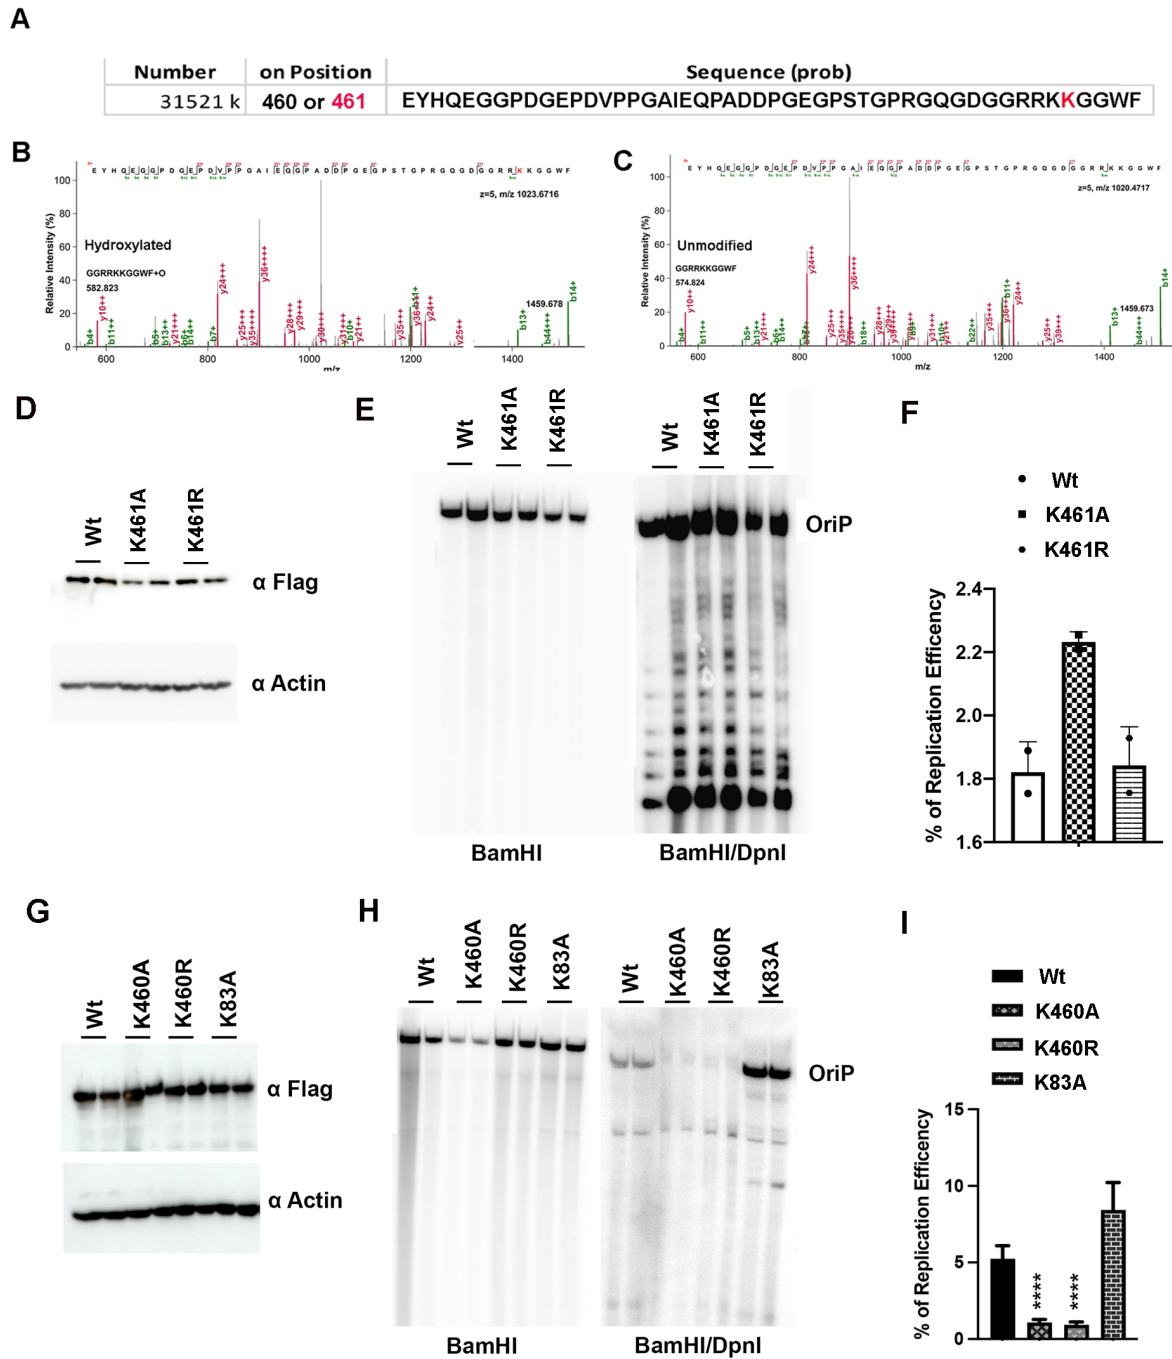

626

627

628

629 **Supplementary Figures**

630

631 **Supplementary Figure S1. RNA expression of PLODs in lymphoid cells. RT-qPCR**

632 analysis of Plod1A, Plod1B, Plod2 and Plod3 transcripts in LCLs generated with B95.8 (B) or

633 Mutu I (M) virus, or BL lines MutuI, Kem1, and Raji. Error bars are standard deviation, n=3

634 technical replicates.

635

636

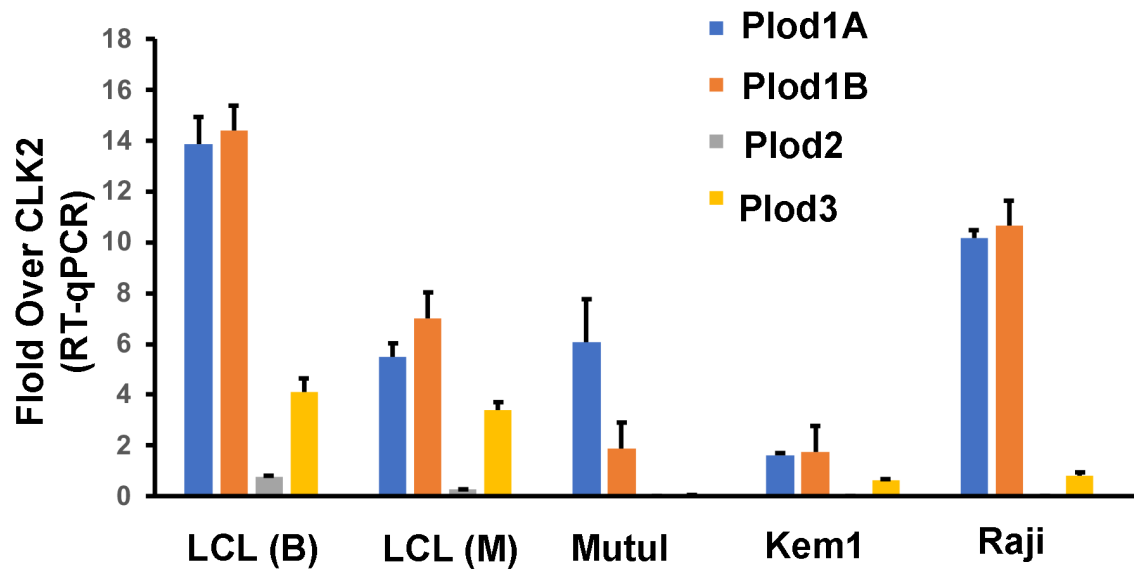



637 **Supplementary Figure S2. A)** RT-qPCR analysis of PLOD1 mRNA in Mutu1 or Raji BL cells,  
638 or B95-8 or Mutu LCLs transduced with shCtrl or shPLOD1. **B)** Western blot of cells treated as  
639 described for panel A, and probed with antibody to PLOD1 (top panel) or Actin (lower panel).  
640 Each lane represents a biological replicate.

641  
642  
643  
644

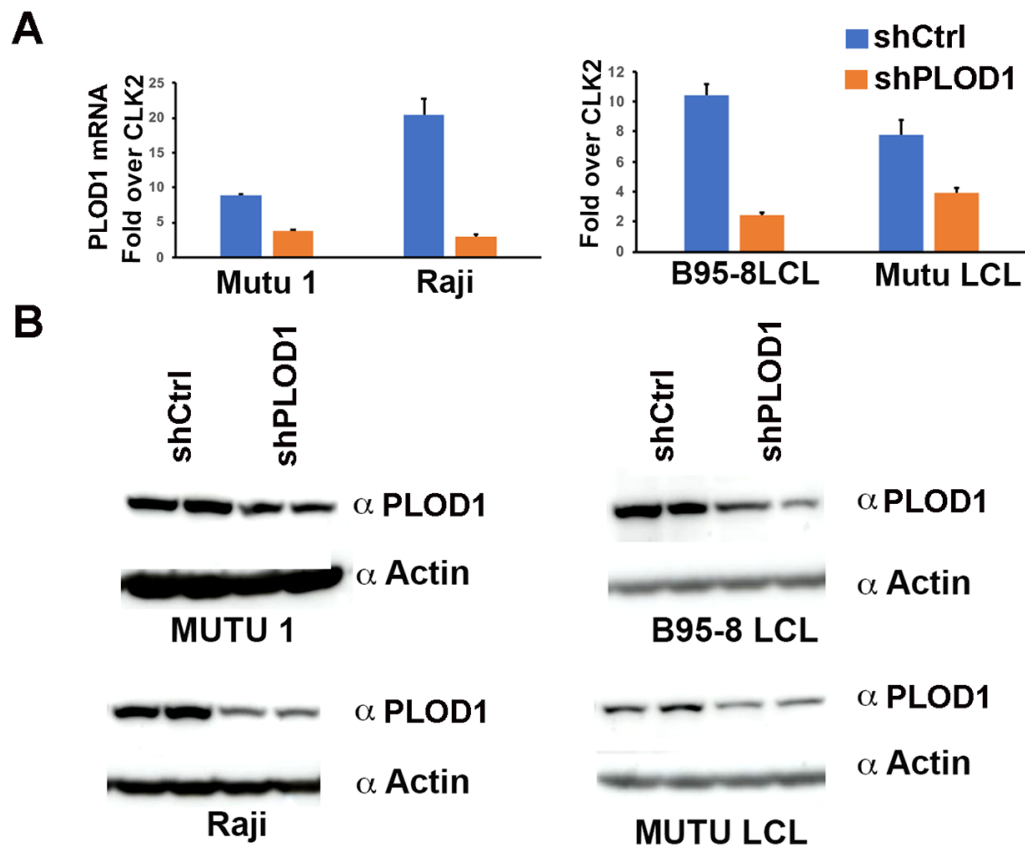

645  
646  
647  
648  
649  
650

651 **Supplementary Figure S3. Mutations in K460 do not disrupt EBNA1 oriP binding in vivo.**

652 **A)** Western blot for FLAG-EBNA1 and Actin in HEK293T cells transfected with *oriP* plasmids

653 expressing FLAG-EBNA1 Wt, K460A, or K460R. **B and C)** ChIP assays for control IgG or

654 FLAG-EBNA1 Wt, K460A, or K460R at *oriP* DS region (**B**) or FR region (**C**) for extracts shown

655 in panel A. P-values determined by ordinary one-way ANOVA and Dunnett's multiple

656 comparison test \*\*\*<0.001, \*<0.05

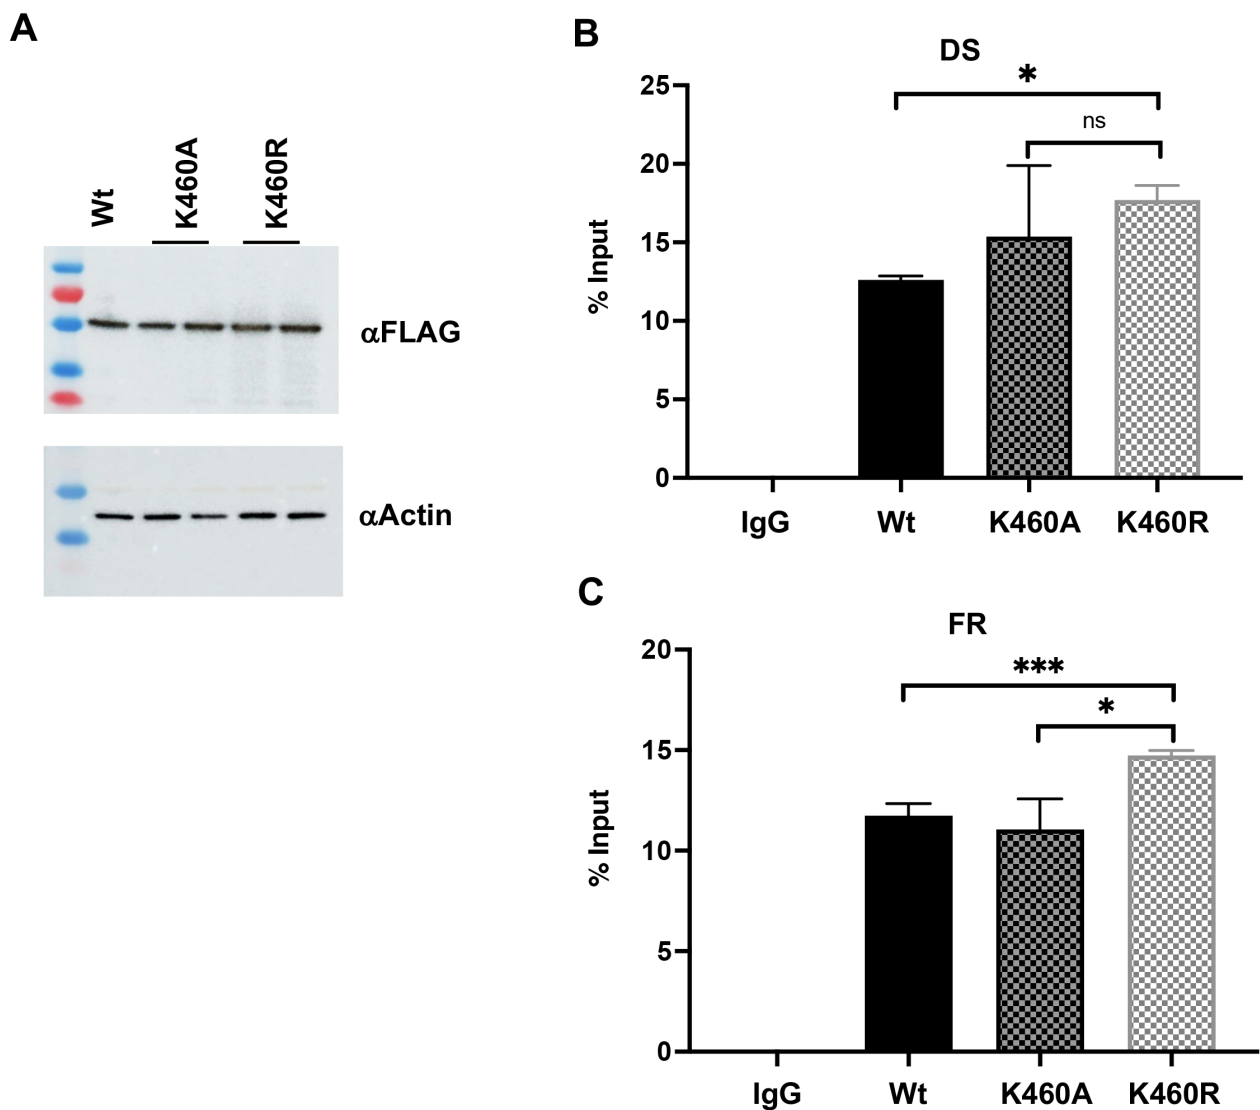

657

658

659

660

661 **Supplementary Figure S4. Mutations in K461 or K83A do not disrupt EBNA1 oriP**

662 **binding in vivo. A)** Western blot for FLAG-EBNA1 and Actin in HEK293T cells transfected with

663 *oriP* plasmids expressing FLAG-EBNA1 Wt, K461A, K460A/K461A, or K83A. **B)** Southern blot

664 of *oriP* replication for cells shown in panel A. **C)** Quantification of *oriP* replication shown in

665 panel B. **D-E)** ChIP assay for control IgG (**E**) or FLAG-EBNA1 (**D**) or at *oriP* DNA for EBNA1

666 Wt, K461A, K460A/K461A, or K83A. . P-values determined by ordinary one-way ANOVA and

667 Dunnett's multiple comparison test \*\*\*<0.001, \*\*<.01, \*<0.05

668

669

670

671

672

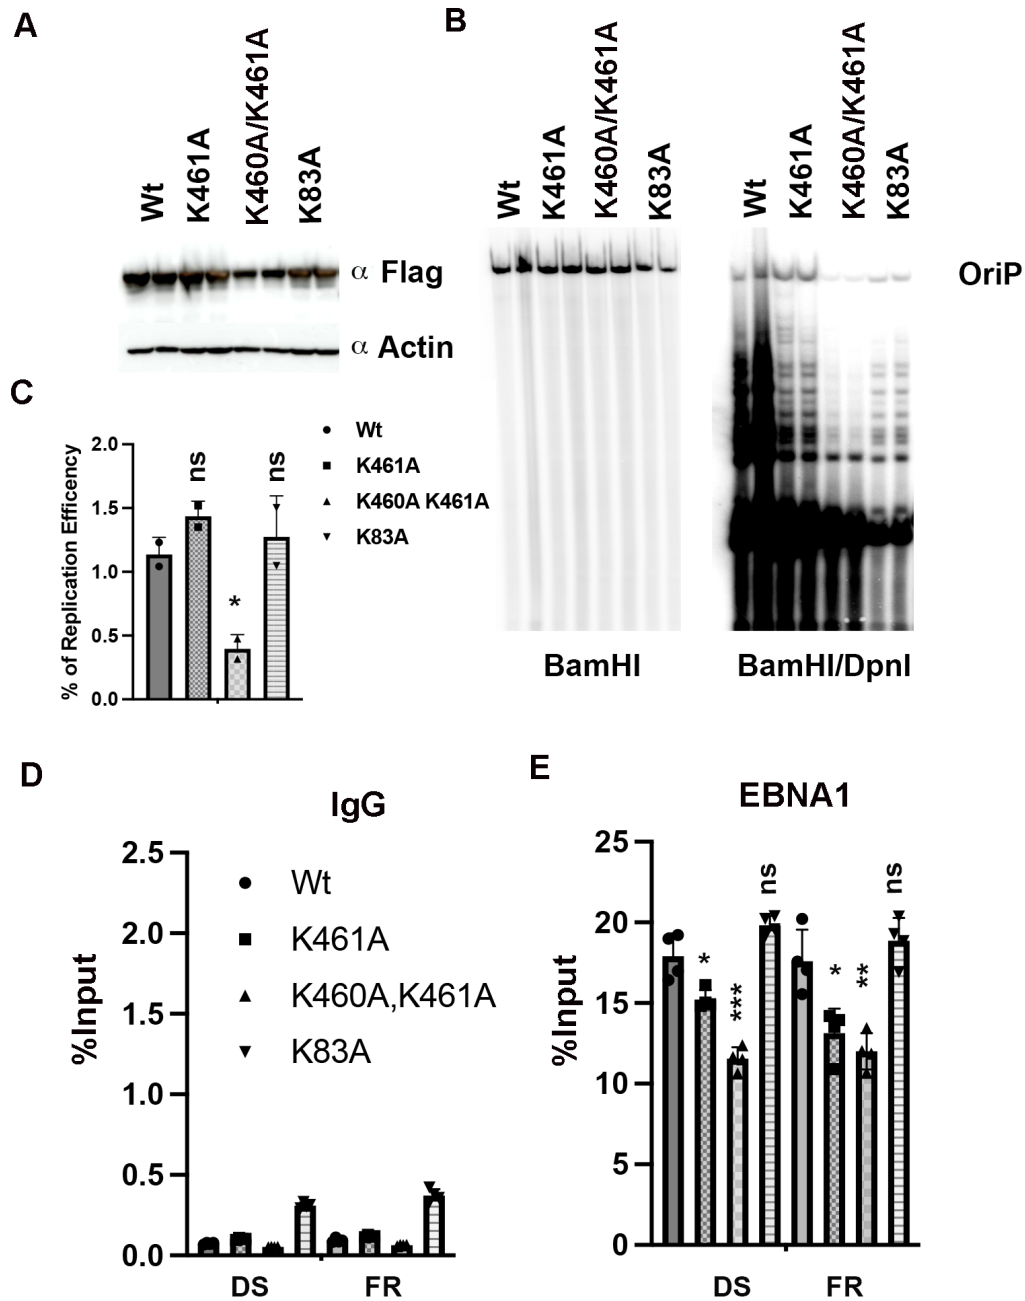

Source: http://biorxiv.org/content/10.1101/2022.03.29.486189v1.full.pdf
